# Supplementary material
Source: publisher site journal article supplement (https://e-cmh.org/upload/media/cmh-2023-0087-Supplementary-Table-3.pdf)
Supplement: Supplementary file 1 [file cmh-2023-0087-Supplementary-Table-3.pdf]

**Supplementary Table 3.** Disclosure of conflict of interests

All committee members who participated in the development of the current guidelines prepared a declaration of interests consisting of the following questions, and information on any conflict of interests within the last 3 years are listed below.

1. Do you have intellectual property rights, such as patents, trademarks, licensing, and royalties, in relation to interventions (drugs, medical technologies, etc.) covered by the clinical practice guidelines?
2. Are you employed (if you have an official/informal title) or have you ever been employed by a company or organization that is commercially related to the interventions covered by the clinical practice guidelines (drugs, medical technology, etc.)?
3. Do you have unlisted shares (stock options, non-trading stocks) or listed shares (over 10 million KRW, including stock options, but excluding indirect investment through mutual funds, etc.) of a company or organization that is commercially related to clinical practice guidelines?
4. Have you ever received research funds, grants, or equipment support from a company or organization that is commercially related to clinical practice guidelines?
5. Have you ever received honoraria, consulting fees, or payments (travel expenses, etc.) exceeding 3 million KRW each year or a total of 10 million KRW or more from companies or organizations that are commercially related to clinical practice guidelines?
6. Do you have any of the relationships described above in your family (parents, spouse, children) or the company in which a family member is involved?

| Name                  | Details                                                      |
|-----------------------|--------------------------------------------------------------|
| Development Committee |                                                              |
| Kyung-Ah Kim          | Nothing to disclose                                          |
| Bo Hyun Kim           | Nothing to disclose                                          |
| Kyeong Hee Kim        | Nothing to disclose                                          |
| Ja Kyung Kim          | Nothing to disclose                                          |
| Jeong Han Kim         | Nothing to disclose                                          |
| Haeryoung Kim         | Nothing to disclose                                          |
| Won Sohn              | Nothing to disclose                                          |
| Dong Hyun Sinn        | Nothing to disclose                                          |
| Kyung Jae Lee         | Nothing to disclose                                          |
| Hyun Woong Lee        | Nothing to disclose                                          |
| Sun Young Yim         | Nothing to disclose                                          |
| Young Chang           | Nothing to disclose                                          |
| Eun Ju Cho            | Nothing to disclose                                          |
| Gwang Hyun Choi       | Nothing to disclose                                          |
| Miyoung Choi          | Nothing to disclose                                          |
| Nae-Yun Heo           | Nothing to disclose                                          |
| Delphi Committee      |                                                              |
| Kang Mo Kim           | Nothing to disclose                                          |
| Moon Young Kim        | Nothing to disclose                                          |
| In Hee Kim            | Nothing to disclose                                          |
| Chang Wook Kim        | Nothing to disclose                                          |
| Byung Seok Lee        | Nothing to disclose                                          |
| Jung Il Lee           | Nothing to disclose                                          |
| Hyung Joon Yim        | Participation in research sponsored by Hoffman-La Roche Ltd. |
| Jeong Won Jang        | Nothing to disclose                                          |
| Dae Won Jun           | Participation in research sponsored by Yuhan, and Dong-A ST  |
| Woo Jin Chung         | Nothing to disclose                                          |
| Jae Youn Cheong       | Nothing to disclose                                          |

**Supplementary Table 3.** Continued

| Name               | Details             |
|--------------------|---------------------|
| Advisory Committee |                     |
| Jae Sung Ko        | Nothing to disclose |
| So Young Kwon      | Nothing to disclose |
| Young Seok Kim     | Nothing to disclose |
| Neung Hwa Park     | Nothing to disclose |
| Joon Hyeok Lee     | Nothing to disclose |
| Han Chu Lee        | Nothing to disclose |
| Sook-Hyang Jeong   | Nothing to disclose |
